# Supplementary material for: One-pot synthesis of PdAuAg nanocrystals for efficient electrocatalytic oxidation of ethanol: achieving morphology control by independently adjusting metal-atom concentrations
Source: Royal Society of Chemistry journal article supplement (doi:10.1039/d4ce00353e), 2024-01-01
Supplement: d4ce00353e1.pdf [file d4ce00353e1.pdf]

Supporting Information

## **One-Pot Synthesis of PdAuAg Nanocrystals for Efficient Electrocatalytic Oxidation of Ethanol: Achieving Morphology Control by Independently Adjusting Metal-Atom Concentrations**

Quanlin Wu,<sup>a</sup> Yuanyuan Min,<sup>b</sup> Yunchi Yang,<sup>b</sup> Yingying Wang,<sup>c\*</sup> Yanyun Ma,<sup>d\*</sup> and Yiqun Zheng<sup>b\*</sup>

<sup>a</sup> School of Resource & Environment and Safety Engineering, Jining University, Qufu, Shandong 273155, China

<sup>b</sup> School of Chemistry, Chemical Engineering, and Materials, Jining University, Qufu, Shandong 273155, China

<sup>c</sup> Health Management Department, Shandong Vocational College of Light Industry, Zibo, 255300, P. R. China

<sup>d</sup> Institute of Functional Nano & Soft Materials (FUNSOM), Jiangsu Key Laboratory of Advanced Negative Carbon Technologies, Soochow University, Suzhou, Jiangsu 215123, China

\*Corresponding author: Prof. Y. Zheng, E-mail: yzheng@jnxu.edu.cn; Prof. Y. Wang, E-mail: hxwyy2005@mail.sdu.edu.cn; Prof. Y. Ma, E-mail: mayanyun@suda.edu.cn

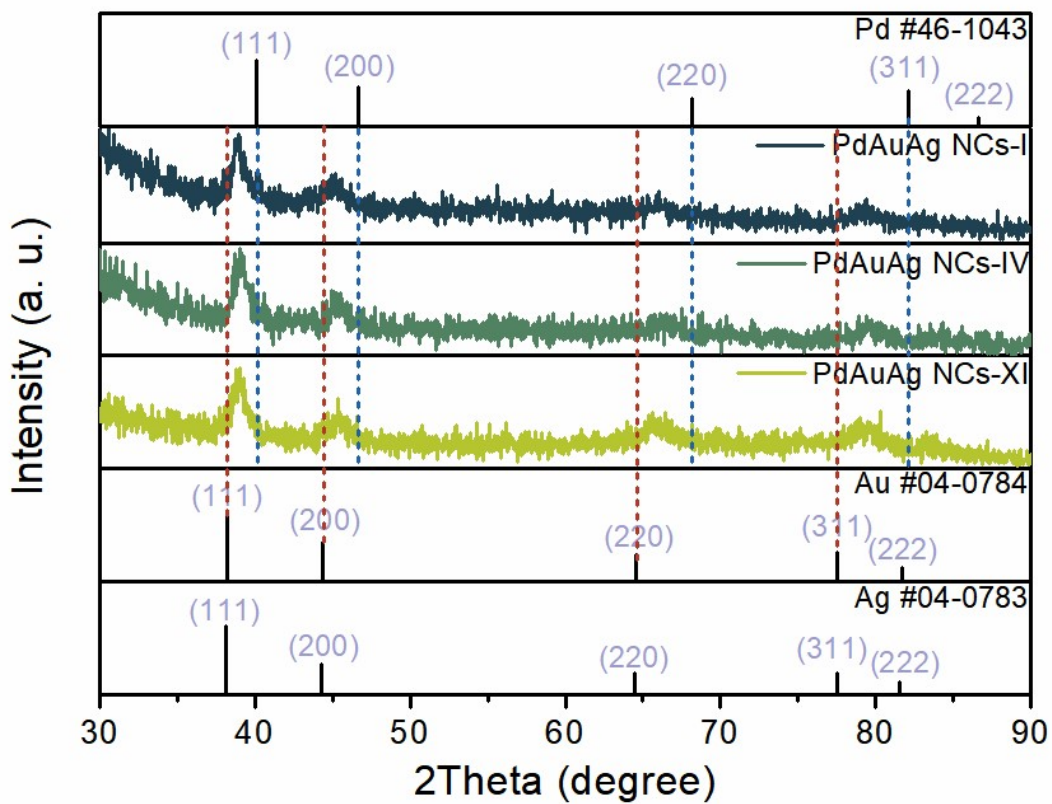

**Figure S1.** XRD patterns of PdAuAg NCs-I, PdAuAg NCs-IV, and PdAuAg NCs-XI, referring to the information of standard cards of Pd, Au and Ag.

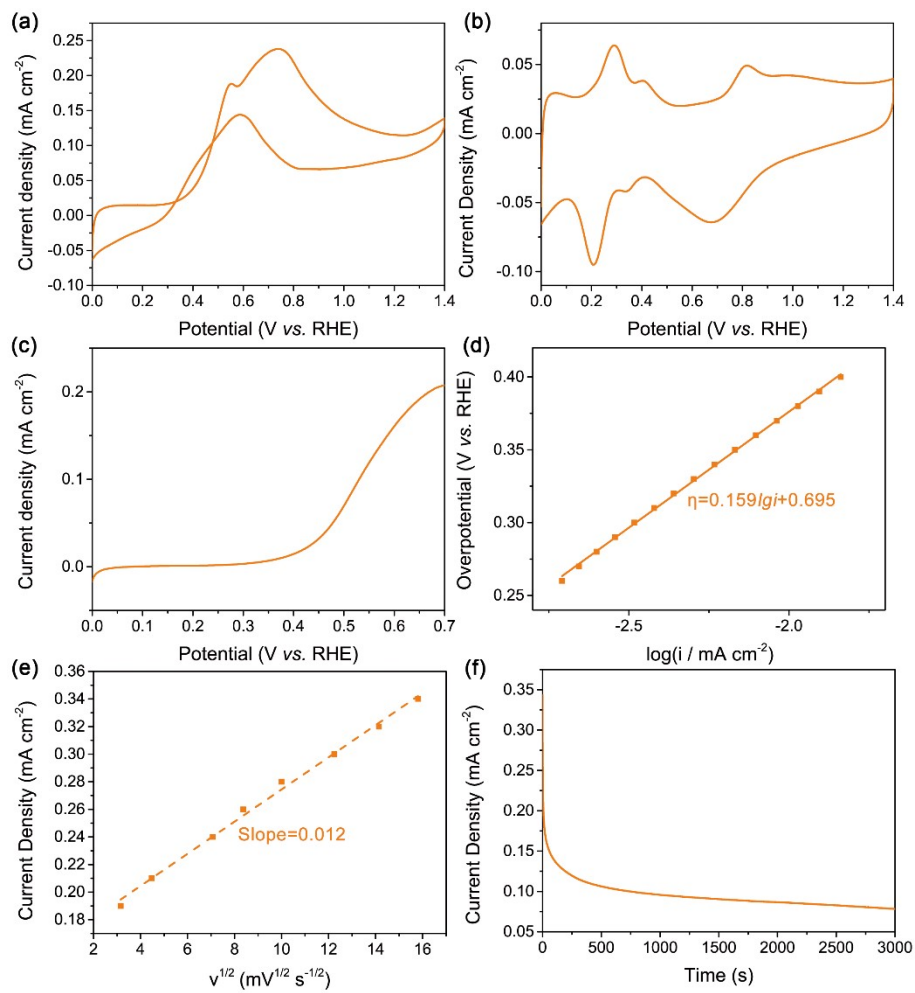

**Figure S2.** EOR measurements of Pt/C: a, b) CV curves in a) 1 M KOH and b) 1 M ethanol+1 M KOH; c) LSV curve; d) Tafel plot; e) EOR kinetics based on specific activity and scan rate; f) *i-t* curve measured at 0.75 V *versus* RHE.

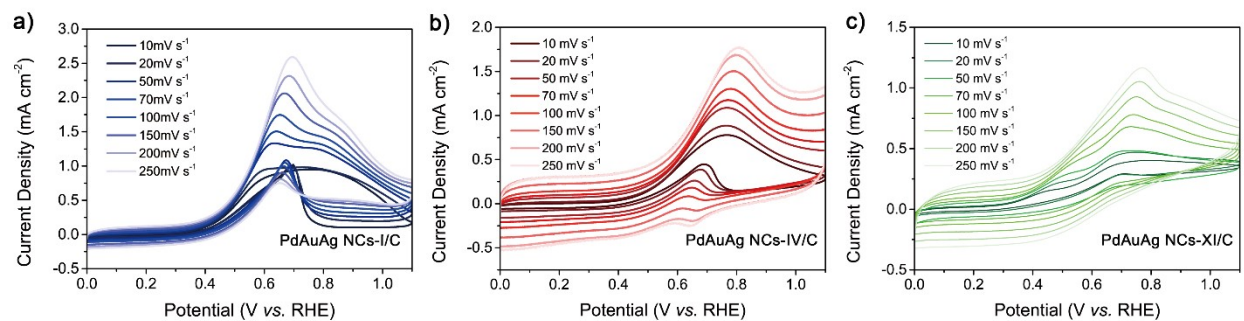

**Figure S3** CV curves of PdAuAg NCs/C collected in 1 M ethanol+1 M KOH at different scan rates.

**Table S1.** Summary of particle size of PdAuAg NCs shown in Figure 1.

| Sample          | Particle Size (nm) |                    |
|-----------------|--------------------|--------------------|
|                 | Average value      | Standard deviation |
| PdAuAg NCs-I    | 16.5               | 1                  |
| PdAuAg NCs-II   | 23.8               | 2                  |
| PdAuAg NCs-III  | 25.1               | 1                  |
| PdAuAg NCs-IV   | 21.5               | 1                  |
| PdAuAg NCs-V    | 22.7               | 3                  |
| PdAuAg NCs-VI   | 17.5               | 1                  |
| PdAuAg NCs-VII  | 28.8               | 2                  |
| PdAuAg NCs-VIII | 27.3               | 2                  |
| PdAuAg NCs-IX   | 25.8               | 3                  |
| PdAuAg NCs-X    | 22.8               | 2                  |
| PdAuAg NCs-XI   | 20.3               | 1                  |
| PdAuAg NCs-XII  | 17.2               | 2                  |

**Table S2.** XRD results and theoretical diffraction peak positions of PdAuAg NCs.

|               |                   | Diffraction Peak Position (°) |       |       |       |
|---------------|-------------------|-------------------------------|-------|-------|-------|
|               |                   | (111)                         | (200) | (220) | (311) |
| PdAuAg NCs-I  | XRD               | 39.0                          | 45.2  | 66.2  | 79.4  |
|               | Theoretical*      | 38.8                          | 45.1  | 65.7  | 79.0  |
| PdAuAg NCs-IV | XRD               | 38.9                          | 45.3  | 66.4  | 79.6  |
|               | Theoretical*      | 39.1                          | 45.5  | 66.2  | 79.7  |
| PdAuAg NCs-XI | XRD               | 39.1                          | 45.5  | 66.0  | 79.4  |
|               | Theoretical*      | 39.0                          | 45.3  | 66.0  | 79.4  |
| Pd            | JCPDS No. 46-1043 | 40.1                          | 46.7  | 68.1  | 82.1  |
| Au            | JCPDS No. 04-0784 | 38.2                          | 44.4  | 64.6  | 77.5  |
| Ag            | JCPDS No. 04-0783 | 38.1                          | 44.3  | 64.4  | 77.5  |

\*The theoretical value was calculated using Vegard's Law.

**Table S3.** Summary of XRD results, crystalline size, and particle size of PdAuAg NCs.

| Sample No.    | Two Theta<br>(°) | Full width at half maxima<br>(FWHM, °) | Crystalline Size*<br>(nm) | Particle Size*<br>(nm) |
|---------------|------------------|----------------------------------------|---------------------------|------------------------|
| PdAuAg NCs-I  | 39.0             | 0.965                                  | 8.7                       | 16.5                   |
| PdAuAg NCs-IV | 38.9             | 0.879                                  | 9.5                       | 21.5                   |
| PdAuAg NCs-XI | 39.1             | 1.085                                  | 7.7                       | 20.3                   |

\*The crystalline size was calculated using Debye-Scherrer equation and the particle size was statistically measured by counting 100 particles in corresponding typical electro-microscope images. The difference between them should be attributed to the anisotropic morphology of current products and the presence of internal defective structure.

**Table S4.** Summary of the relative peak areas (%) for each split B.E. peak and the parameters used to fit the Pd 3d, Ag 3d, and Au 4f high-resolution XPS spectra.

| Sample        | Orbital | B. E. Peak (eV) | FWHM (eV) | peak area (a. u.) | element/oxidation state |
|---------------|---------|-----------------|-----------|-------------------|-------------------------|
| PdAuAg NCs-I  | Pd 3d   | 335.1           | 1.1       | 30.5              | Pd(0)                   |
|               |         | 340.4           | 1.1       | 17.9              | Pd(II)                  |
|               |         | 335.9           | 2.5       | 31.8              | Pd(0)                   |
|               |         | 341.0           | 2.8       | 19.8              | Pd(II)                  |
|               | Ag 3d   | 368.0           | 1.2       | 40.7              | Ag(0)                   |
|               |         | 373.9           | 1.1       | 26.6              | Ag(I)                   |
|               |         | 368.6           | 3.5       | 20.1              | Ag(0)                   |
|               |         | 374.4           | 2.8       | 12.7              | Ag(I)                   |
|               | Au 4f   | 84.1            | 0.9       | 50.0              | Au(0)                   |
|               |         | 87.7            | 1.0       | 38.1              | Au(I)                   |
|               |         | 84.5            | 2.5       | 8.9               | Au(0)                   |
|               |         | 88.4            | 2.3       | 3.0               | Au(I)                   |
| PdAuAg NCs-IV | Pd 3d   | 334.7           | 0.8       | 26.0              | Pd(0)                   |
|               |         | 340.0           | 0.8       | 16.9              | Pd(II)                  |
|               |         | 334.9           | 3.5       | 26.3              | Pd(0)                   |
|               |         | 339.7           | 3.5       | 30.8              | Pd(II)                  |
|               | Ag 3d   | 367.7           | 0.8       | 42.3              | Ag(0)                   |
|               |         | 373.7           | 0.9       | 30.4              | Ag(I)                   |
|               |         | 367.9           | 2.4       | 17.8              | Ag(0)                   |
|               |         | 374.1           | 2.4       | 9.5               | Ag(I)                   |
|               | Au 4f   | 87.4            | 0.9       | 42.0              | Au(0)                   |
|               |         | 83.8            | 0.9       | 32.3              | Au(I)                   |
|               |         | 87.7            | 2.7       | 14.2              | Au(0)                   |
|               |         | 84.1            | 2.8       | 11.5              | Au(I)                   |
| PdAuAg NCs-XI | Pd 3d   | 334.8           | 3.4       | 48.0              | Pd(0)                   |
|               |         | 339.9           | 0.8       | 18.9              | Pd(II)                  |



|  |       |       |     |      |        |
|--|-------|-------|-----|------|--------|
|  |       | 335.6 | 2.4 | 21.7 | Pd(0)  |
|  |       | 340.1 | 2.7 | 11.4 | Pd(II) |
|  | Ag 3d | 367.3 | 0.8 | 43.0 | Ag(0)  |
|  |       | 373.4 | 0.8 | 29.4 | Ag(I)  |
|  |       | 367.8 | 2.4 | 17.0 | Ag(0)  |
|  |       | 373.7 | 2.4 | 10.6 | Ag(I)  |
|  | Au 4f | 83.4  | 0.8 | 38.8 | Au(0)  |
|  |       | 87.1  | 0.8 | 29.6 | Au(I)  |
|  |       | 83.7  | 2.4 | 17.1 | Au(0)  |
|  |       | 87.3  | 2.4 | 14.5 | Au(I)  |
